# Supplementary material for: Ridged twin boundaries as prolific dislocation sources in high-entropy alloys and other low stacking-fault energy metals
Source: Research Square preprint supplement (doi:10.21203/rs.3.rs-1477385/v1), 2022-05-25
Supplement: Supplementary file 1 [file fe279be8980500642818889b.docx]

Supplementary Information

**Ridged twin boundaries as prolific dislocation sources in high-entropy alloys and other low stacking-fault energy metals**

Xiaoqian Fu1, Jun Ding2,*,Cigdem Ozsoy-Keskinbora3,4, Guang Yang5, Yujie Chen1, Yan Fang1, Eun Soo Park6, Ze Zhang1, Robert O. Ritchie7,8,*, En Ma2,* and Qian Yu1,*

1 Center of Electron Microscopy and State Key Laboratory of Silicon Materials, School of Materials Science & Engineering, Zhejiang University, Hangzhou, 310027, China.

2 Center for Alloy Innovation and Design (CAID), State Key Laboratory for Mechanical Behavior of Materials, Xi'an Jiaotong University, Xi'an 710049, China.

3 Materials Science Division, Thermo Fisher Scientific, Achtseweg Noord 5, 5651 GG Eindhoven, The Netherlands.

4 John A. Paulson School of Engineering and Applied Sciences, Harvard University, Cambridge, MA 02138, USA.

5 Thermo Fisher Scientific Inc., 2517 Jinke Road, Shanghai, 201210, China.

6 Research Institute of Advanced Materials, Department of Materials Science and Engineering, Seoul National University, Seoul 08826, Republic of Korea.

7 Materials Sciences Division, Lawrence Berkeley National Laboratory, Berkeley, CA, 94720, USA.

8 Department of Materials Science & Engineering, University of California, Berkeley, CA, 94720, USA.

* Corresponding authors: Jun Ding (dingsn@xjtu.edu.cn), Robert O. Ritchie (roritchie@lbl.gov), En Ma (maen@xjtu.edu.cn), and Qian Yu (yu_qian@zju.edu.cn)

**Movie 1. Dislocation activity at twin-twin junction during *in situ* TEM tensile test**. The dislocations were generated from twin-twin junction and then sluggishly moved on coherent twin boundaries with frequent pinning and de-pinning.


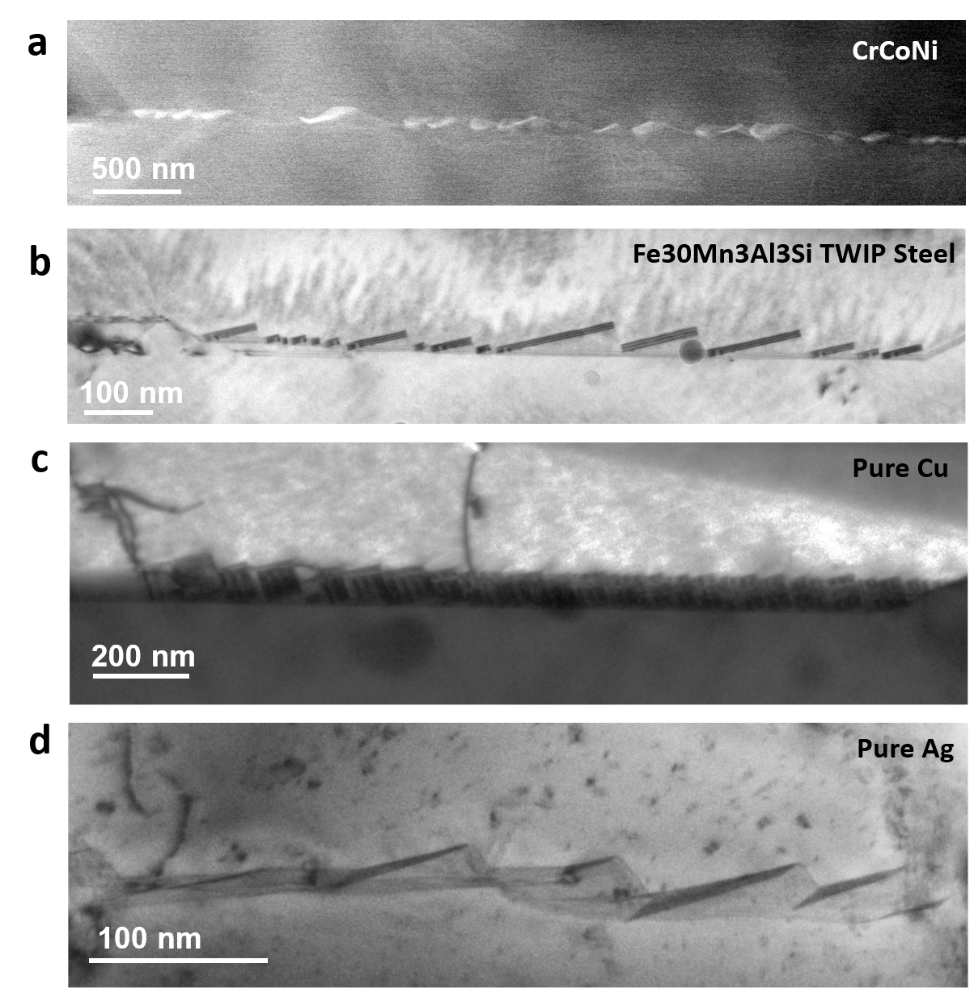


**Figure S1 | Typical images of ridge-twin structures in different low-SFE materials.** **(a)** Equiatomic CrCoNi medium-entropy alloy; **(b)** TWIP steel; **(c)** Pure Cu; **(d)** Pure Ag.


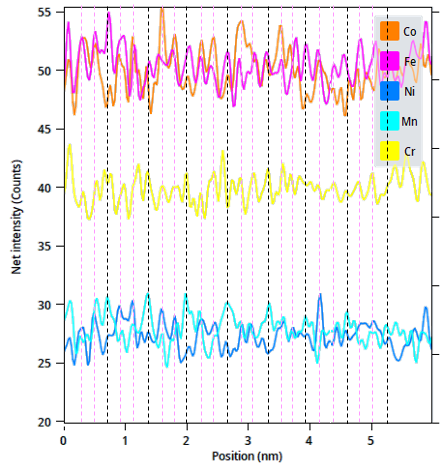


**Figure S2** **| Line profiles of intensity along a Σ3{112}-like ITB.** The dark dashed lines marked out the Mn-enriched column, and the pink dashed lines marked out Co- and Ni-enriched columns. The enriched columns repeat every three atomic planes.


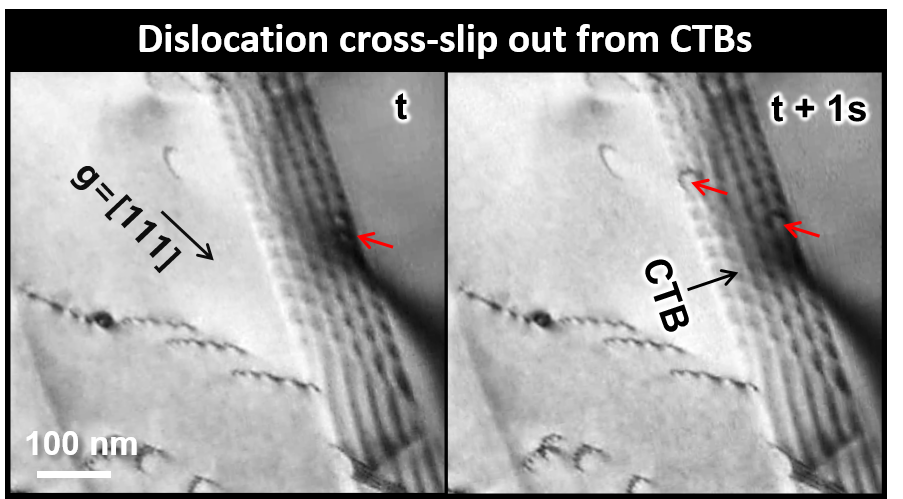


**Figure S3** | **Cross slip of dislocations on a CTB to grain interior.** The cross-slipped dislocations are indicated by red arrows.


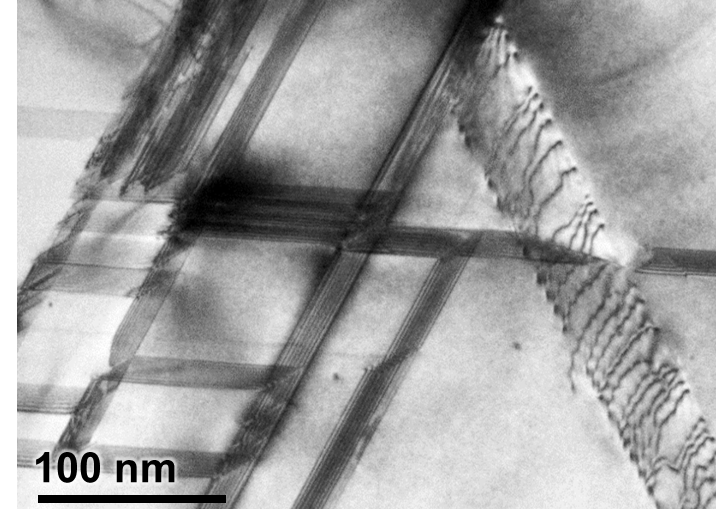


**Figure S4 | Dislocation activities within grains during the deformation process.** Strong interactions between dislocations and stacking faults were observed.


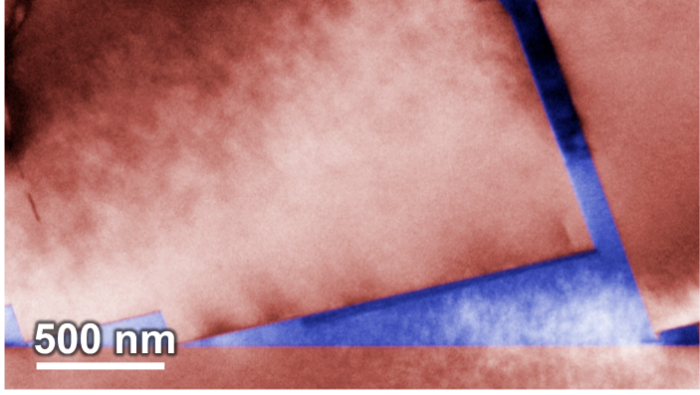


**Figure S5 | Twin lamellas formed at the node of the ridge-twin boundary.**


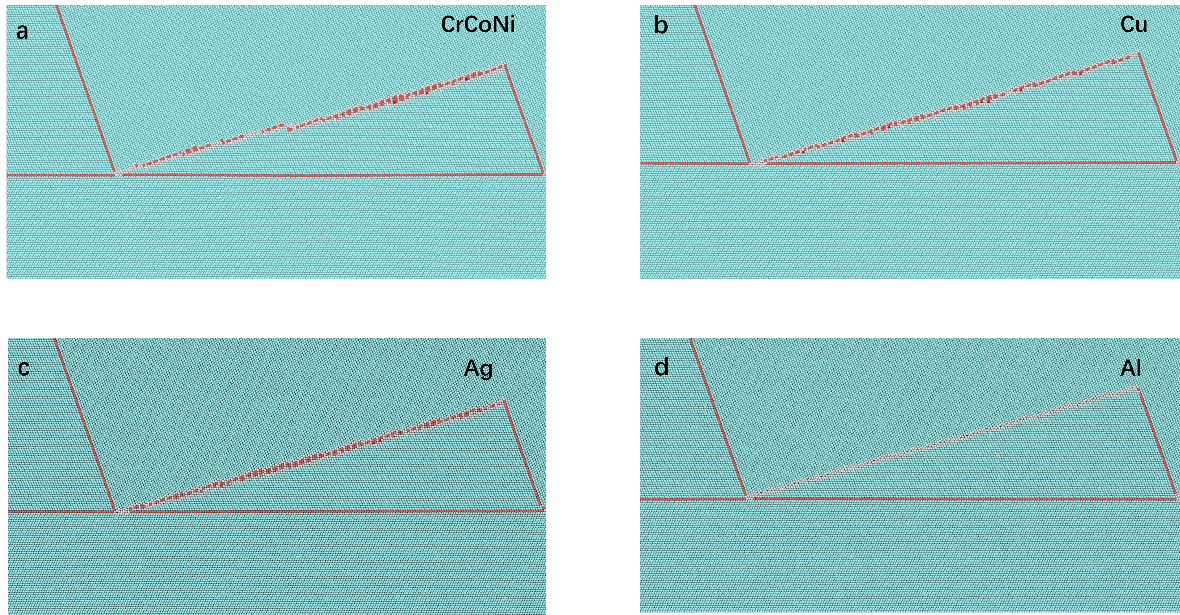


**Figure S6 | Atomic configuration of ridge twins constructed in materials with different SFE.** **(a)** CrCoNi medium-entropy alloy; **(b)** Cu; **(c)** Ag; **(d)** Al. The atoms are colored according to common neighbor analysis: blue, red and white atoms represent *fcc*, *hcp* and *other* structures, respectively.


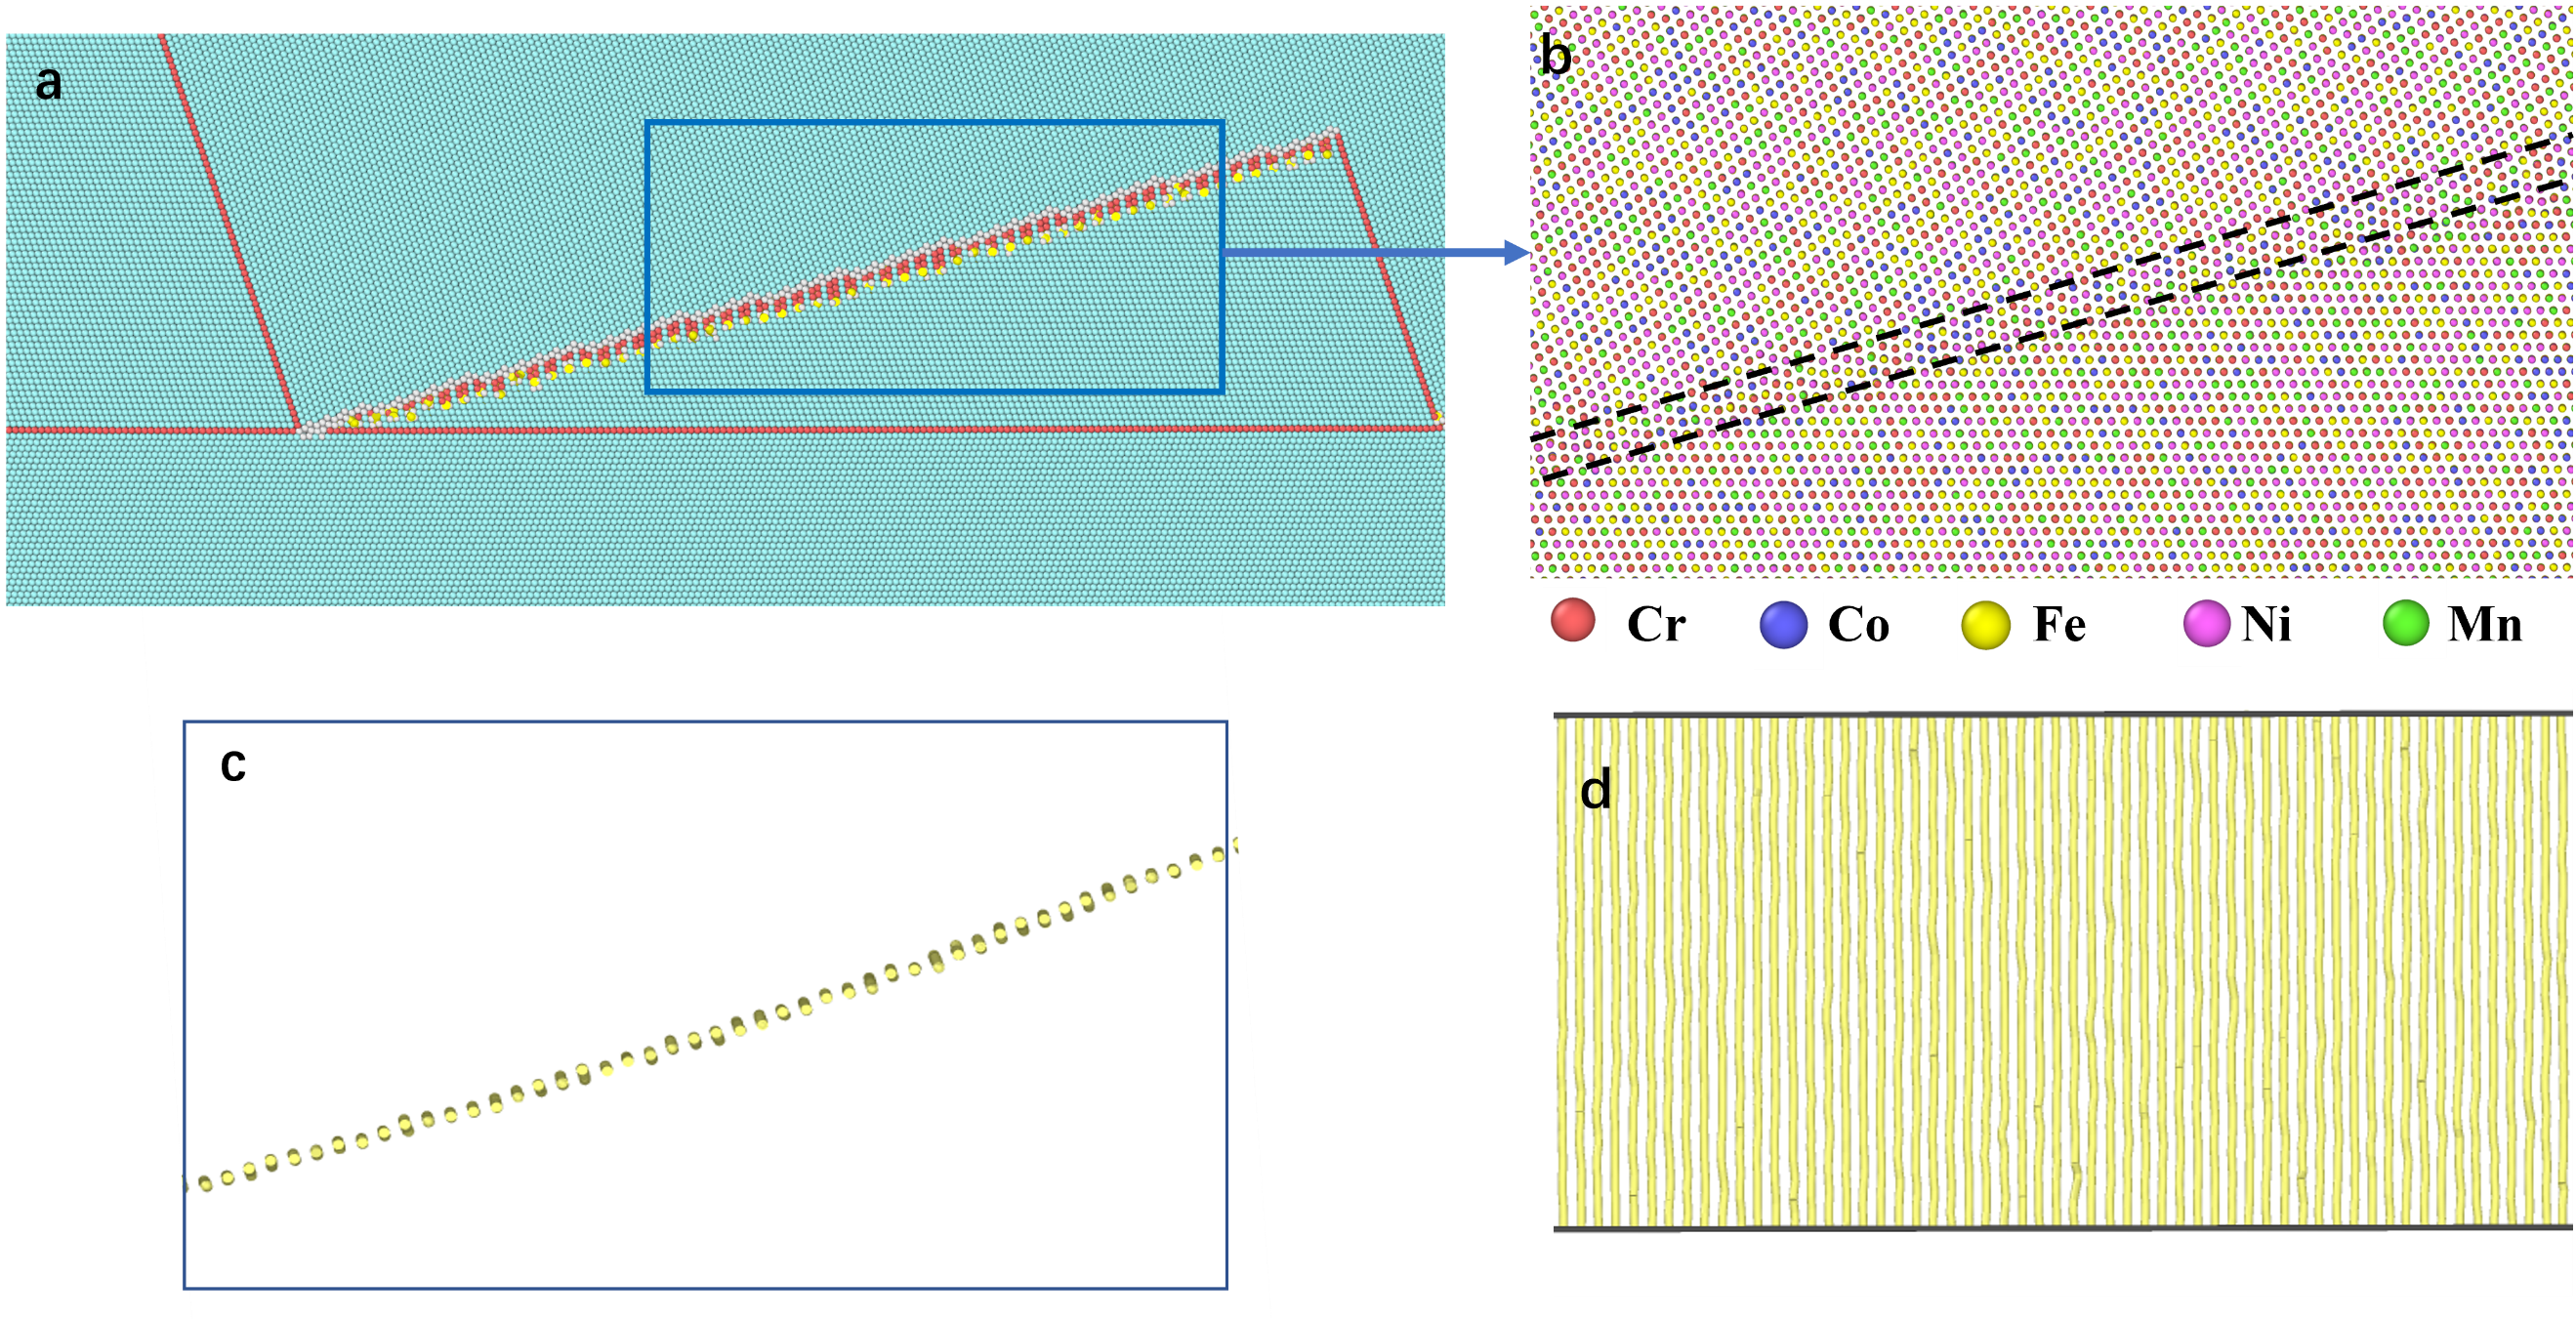


**Figure S7 | Atomic configuration and dislocation array on the Σ3{112}-like ITBs in Cr20Mn14Fe26Co26Ni24.** **(a)** Atomic configuration of the ridge-twin structure; **(b)** Enlarged view of atomic configuration of Σ3{112}-like ITBs (denoted by blue lines) of Cr20Mn14Fe26Co26Ni14 alloy. **(b)** and **(c)** are the side view and top view, respectively, of the array of Shockley partials in Σ3{112}-like ITBs.


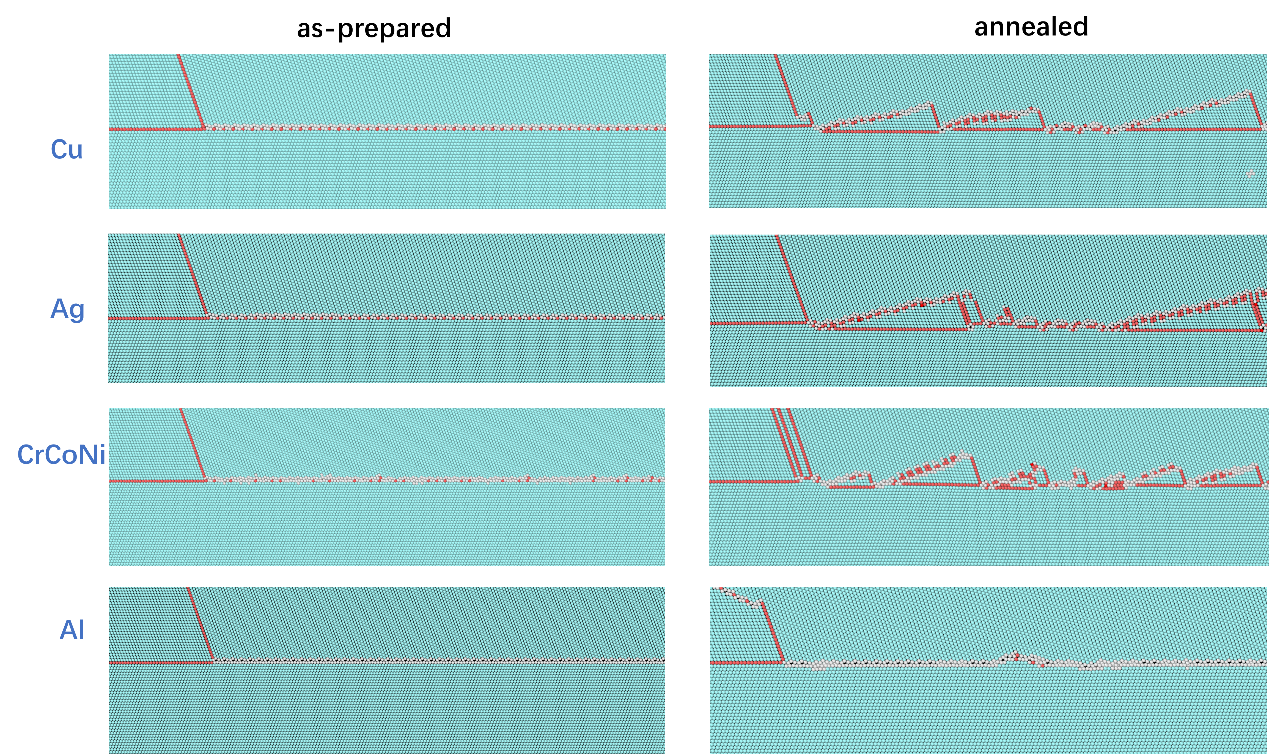


**Figure S8 | Observation of the formation of the ridge twins in different SFE materials during annealing by MD simulation.** The as-prepared and annealed configurations with Σ9{115}{111} GBs are shown for CrCoNi alloy, Cu, Ag and Al.


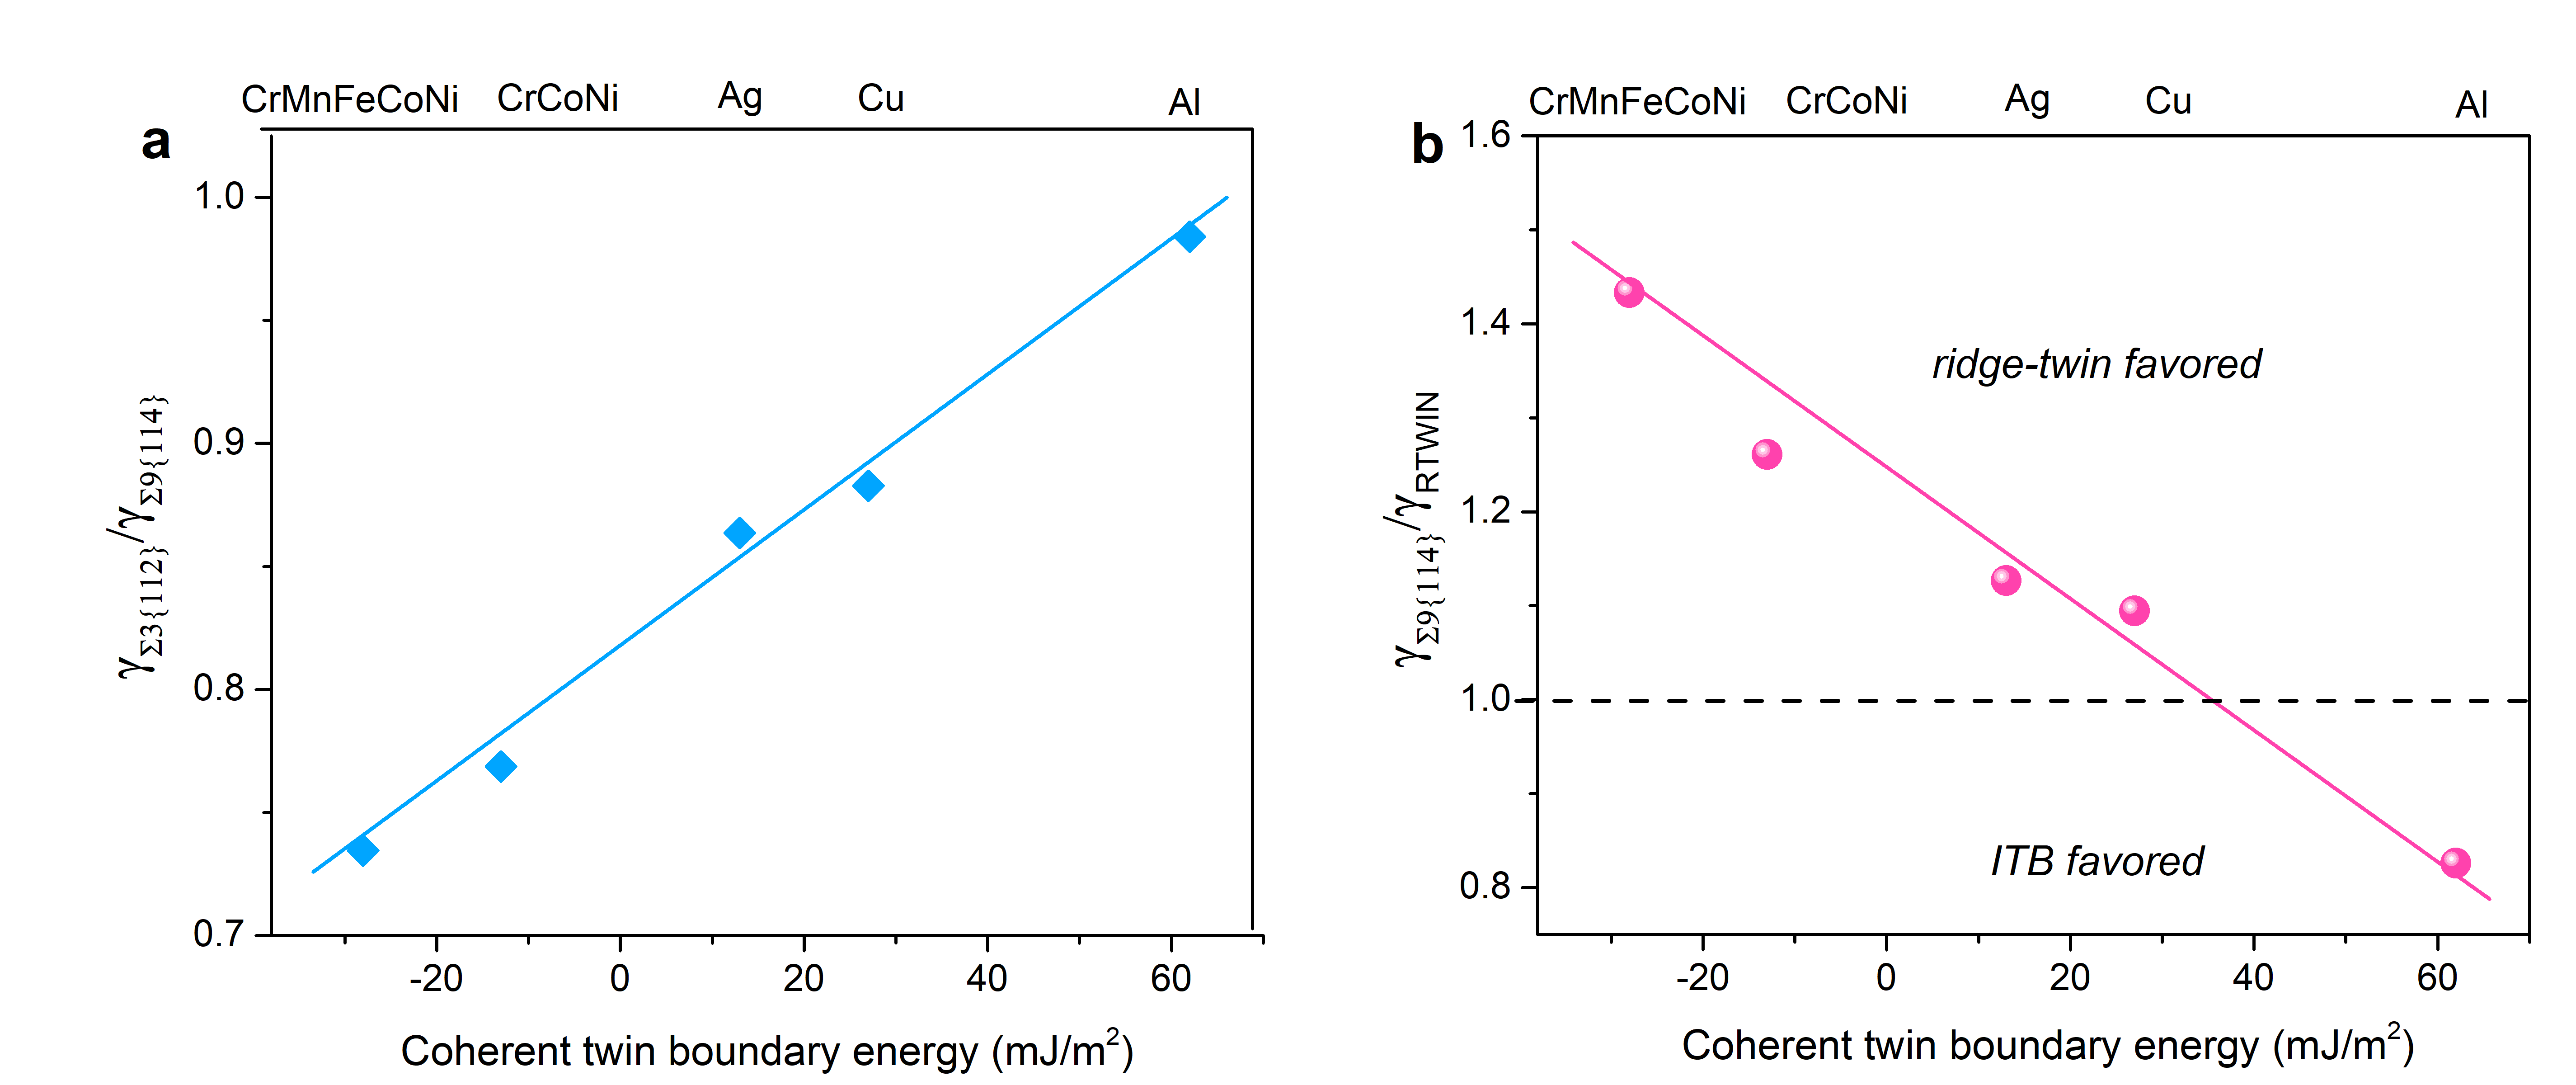


**Figure S9 | Interfacial energies related with the coherent twin boundary energies.** (**a**) The ratio of interfacial energy of Σ3{112}-like ITBs and Σ9{114} GB for all the studied materials; (**b**) The ratio of interfacial energy of Σ9{114} GB and ridge-twin structure for all the studied materials; the dashed line indicates the ratio of 1.0, which divides the ridge-twin favored and ITB favored regions.


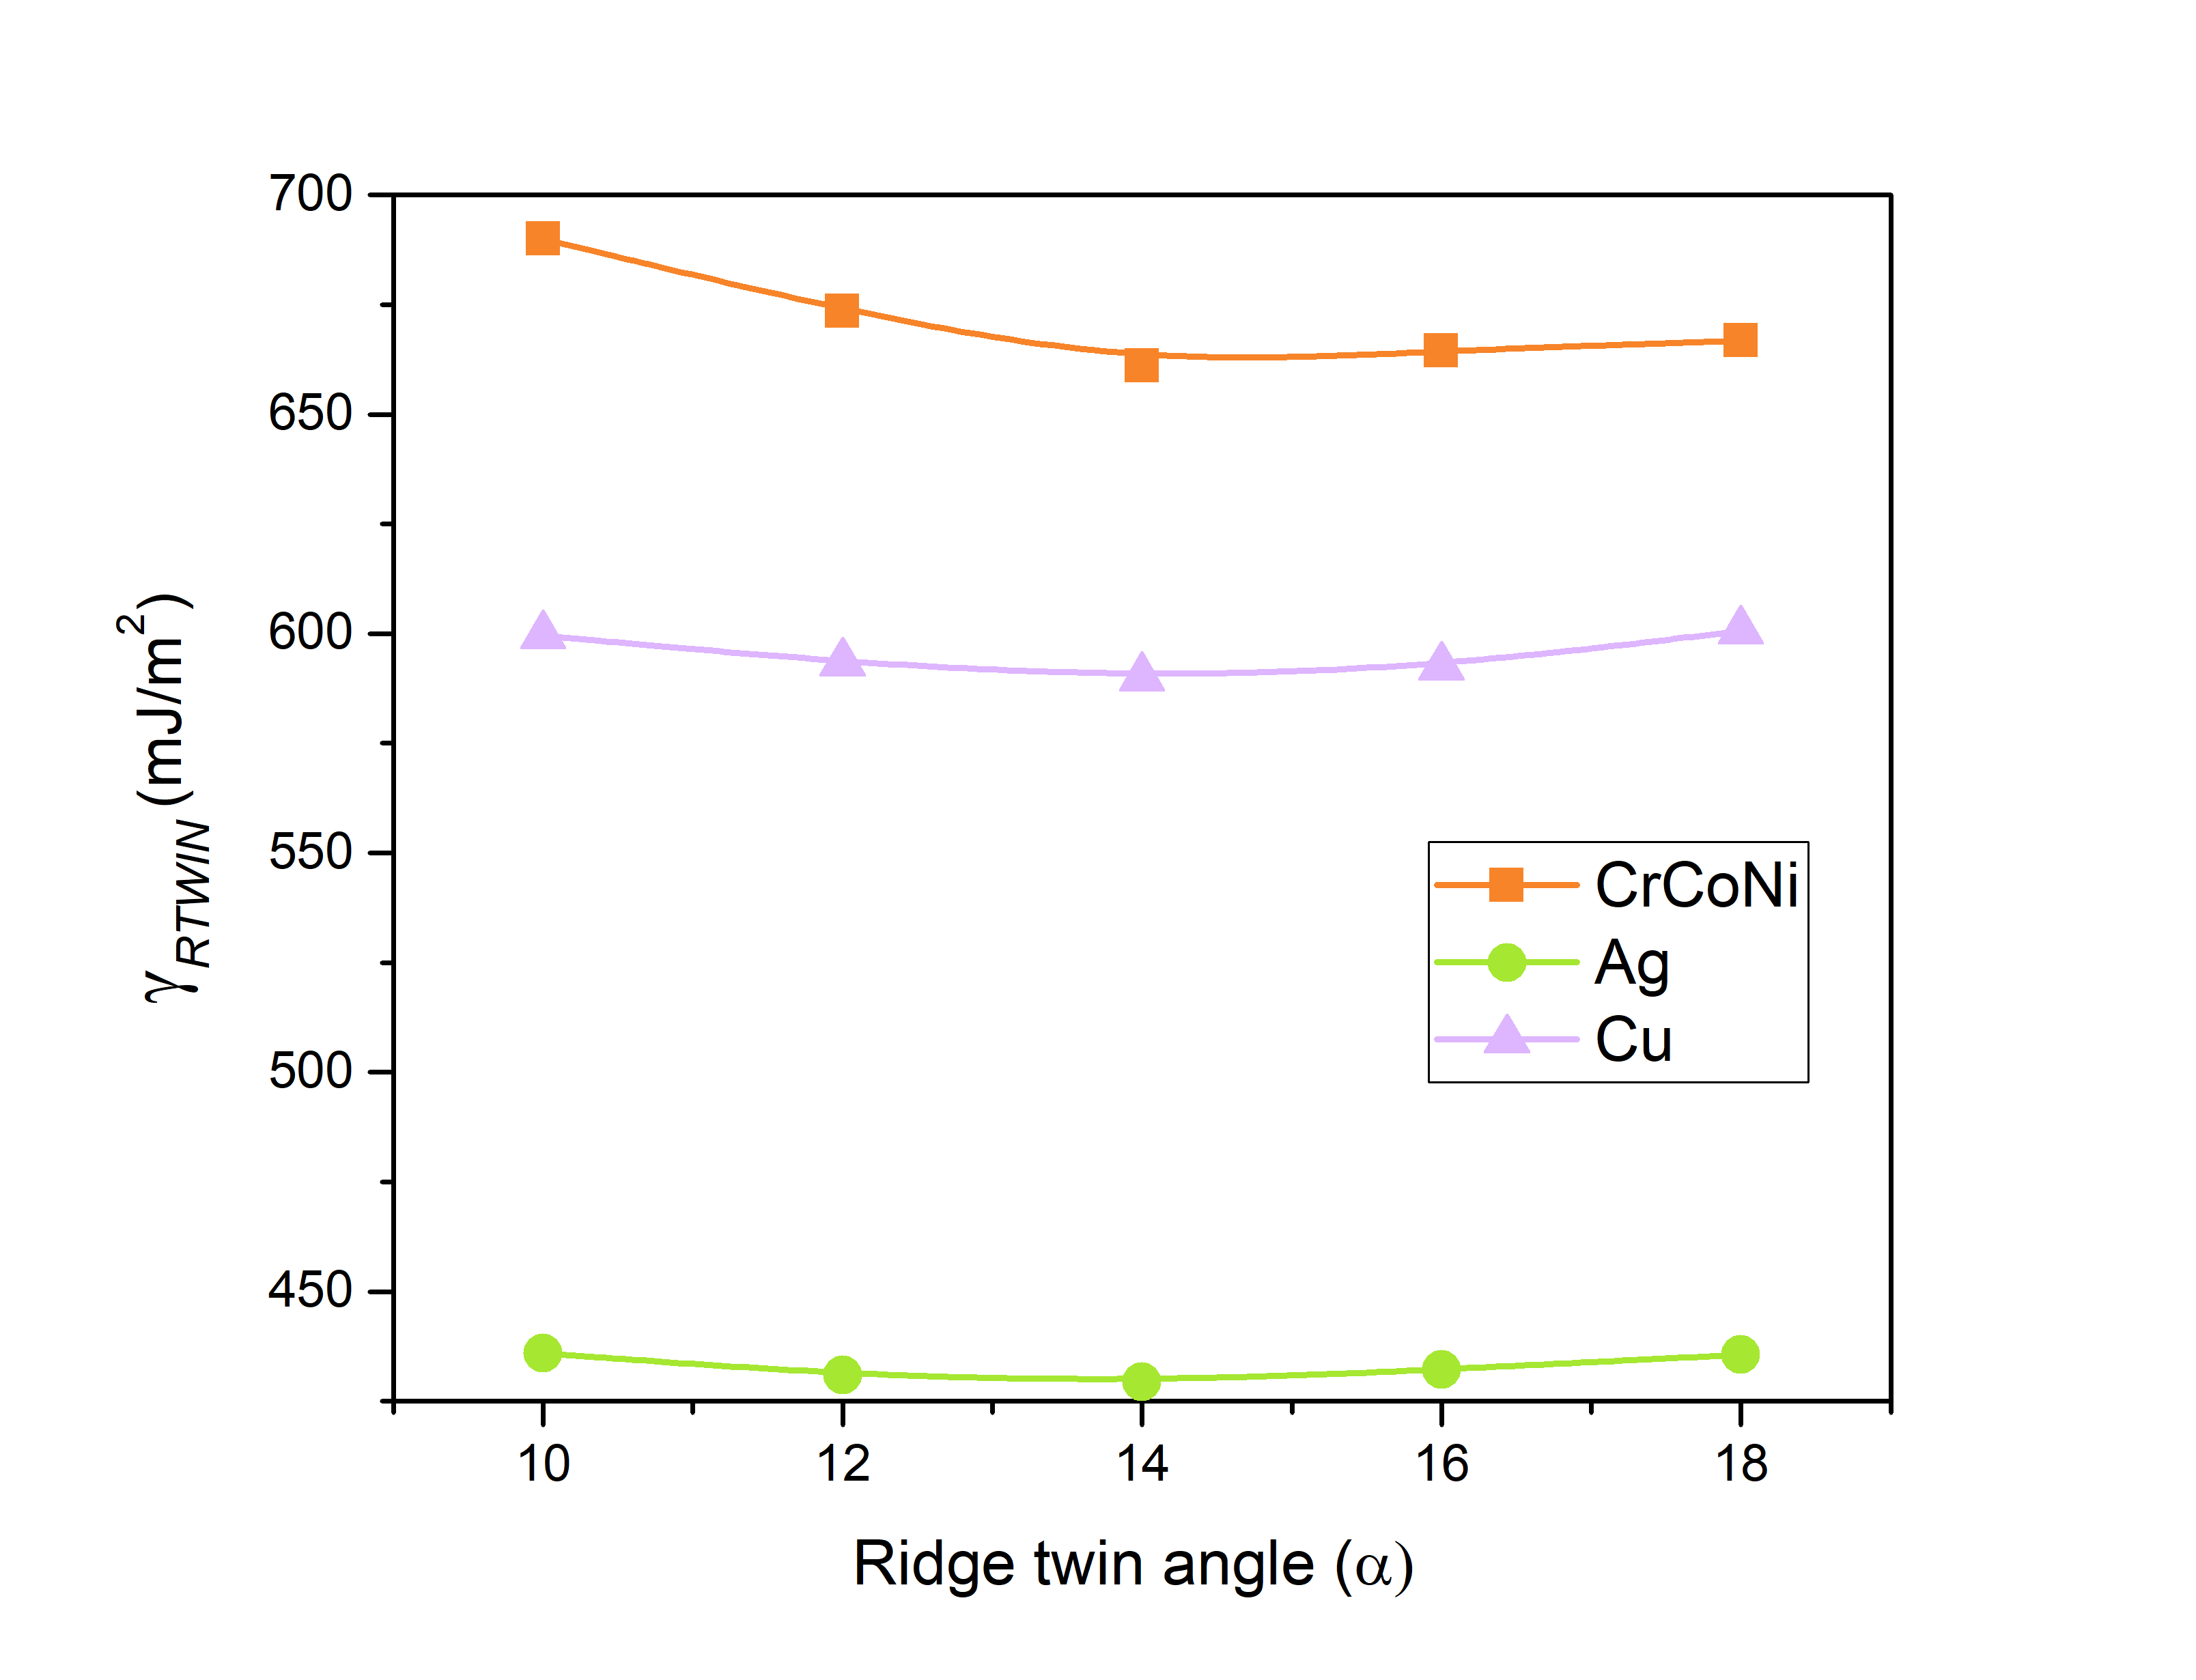


**Figure S10 |The interfacial energy of ridge twins at various angles for CrCoNi, Ag and Cu.**


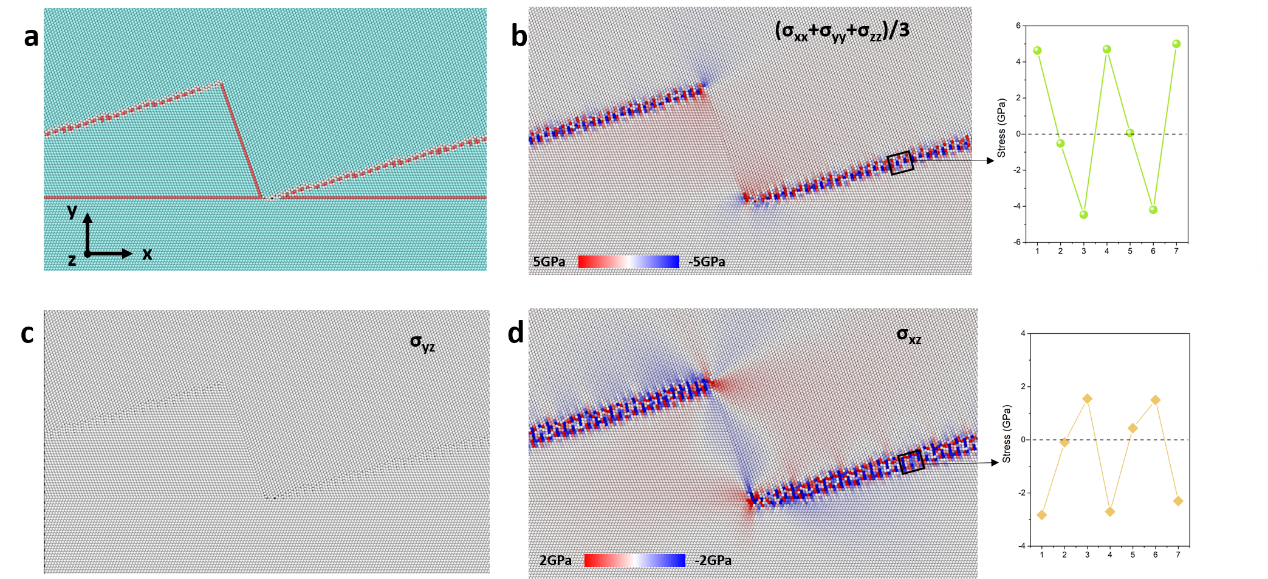


**Figure S11 | Stress field of hydrostatic stress and shear stress of ridge twin in pure Ag.** A ridge twin with the length of ~60 nm was introduced in the middle (y-direction) of the configuration, which was applied with periodic boundary condition in x and z direction and free surface in y direction; **(a)** Atomic configuration; **(b)** Hydrostatic stress and corresponding profile; **(c-d)** Shear stress and corresponding profile.


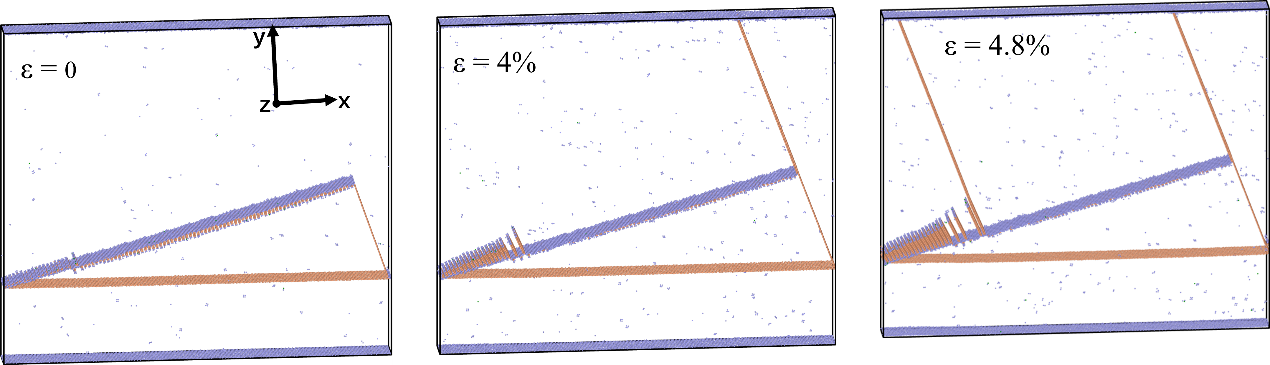


**Figure S12 | Tensile deformation of Cr20Mn14Fe26Co26Ni14 alloy by MD simulation.** Only non-*fcc* atoms are colored (orange for *hcp* atoms and purple for *other* atoms). A sample of ridge-twin structure with the dimension of ~60 nm in x, ~54 nm in y and 10 nm in z direction, was applied with periodic boundary condition in x and z direction and free surface in y direction. A uniaxial tensile deformation in x axis was applied with the strain rate of 10-5 /ps at 300 K.
